# Supplementary material for: An in situ gold-decorated 3D branched ZnO nanocomposite and its enhanced absorption and photo-oxidation performance for removing arsenic from water
Source: Royal Society of Chemistry journal article supplement (doi:10.1039/c6ra22243a), 2016-01-01
Supplement: c6ra22243a1.pdf [file c6ra22243a1.pdf]

## Supporting Information

### **In-situ gold decorated 3D branched ZnO nanocomposite and their enhanced absorption and photooxidation performances for removing of arsenic from water**

Mianli Huang,<sup>a</sup> Wenhui Feng,<sup>b</sup> Wentao Xu,<sup>a</sup> and Ping Liu\*<sup>b</sup>

<sup>a</sup> Quanzhou Normal University, Quanzhou, 362000, China

<sup>b</sup> State Key Laboratory of Photocatalysis on Energy and Environment, Fuzhou University, Fujian 350002, China. Email: liuping@fzu.edu.cn

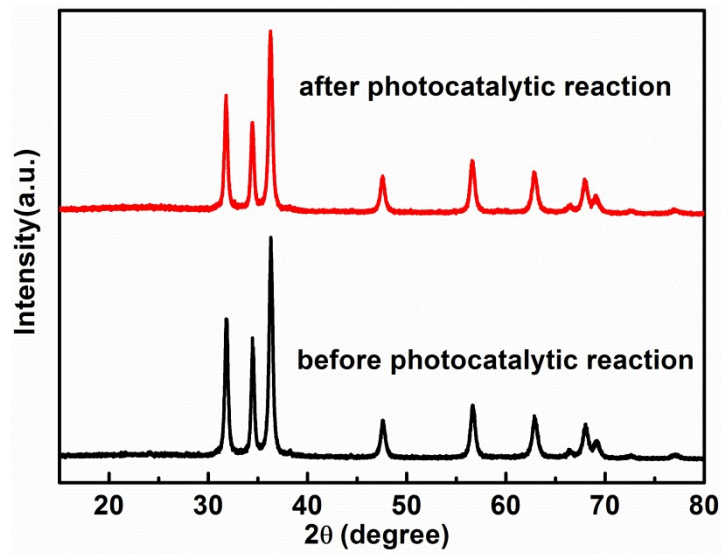

**Figure S1.** XRD patterns of the ZnO-Au(0.5%) sample before and after photocatalytic reaction

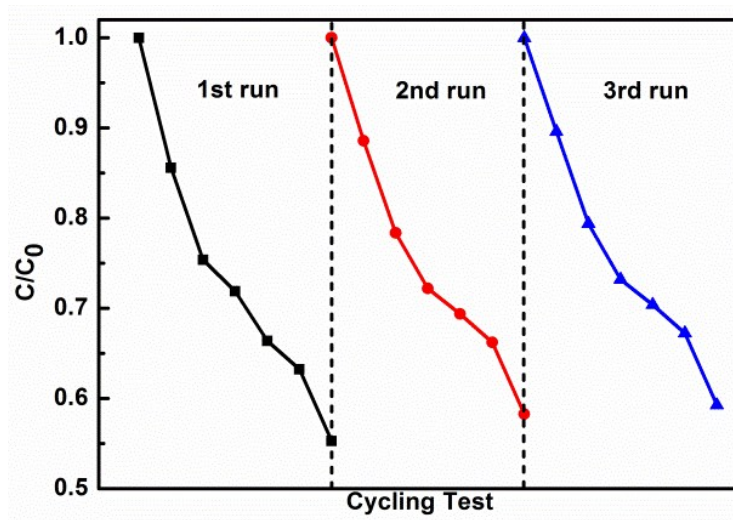

**Figure S2.** Photocatalytic cycling test of ZnO-Au(1%)

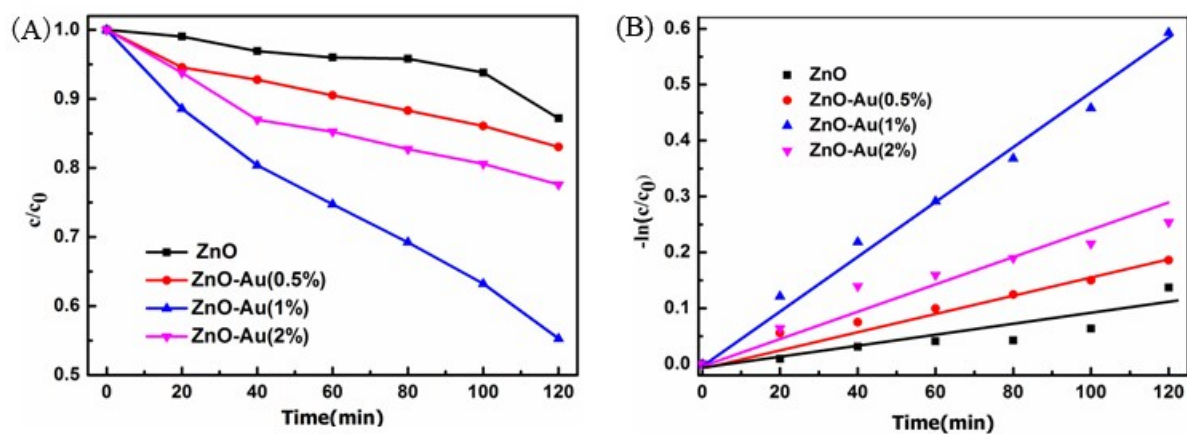

**Figure S3.** (A) Photocatalytic oxidation abilities toward As(III) under visible light (> 400 nm) (B) Linear fitting results of pseudo-first-order kinetics.
